# Supplementary material for: Groundwater data improve modelling of headwater stream CO 2 outgassing with a stable DIC isotope approach
Source: Copernicus journal article supplement (doi:10.5194/bg-15-3093-2018), 2018-05-18
Supplement: Supplementary file 1 [file bg-15-3093-2018-supplement.pdf]

Supplement of Biogeosciences, 15, 3093–3106, 2018  
<https://doi.org/10.5194/bg-15-3093-2018-supplement>  
© Author(s) 2018. This work is distributed under  
the Creative Commons Attribution 4.0 License.

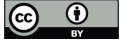

*Supplement of*

## **Groundwater data improve modelling of headwater stream CO<sub>2</sub> outgassing with a stable DIC isotope approach**

**Anne Marx et al.**

*Correspondence to:* Anne Marx ([anne.marx@fau.de](mailto:anne.marx@fau.de))

The copyright of individual parts of the supplement might differ from the CC BY 4.0 License.

**Table S1:** Analytical results of stream water. Samples were taken at the V-notch weir located at the catchment outlet for discharge measurements.  
empty cells: data not available

| Sample ID | Collection date<br>dd-mmm-yyyy | O <sub>2</sub><br>/mg/L | O <sub>2</sub><br>/%-sat. | T<br>/°C | pH   | EC<br>/μS cm <sup>-1</sup> | Eh<br>/mV | TA<br>/mg L <sup>-1</sup> CaCO <sub>3</sub> | δ <sup>13</sup> C-DIC<br>/‰ VPDB | δ <sup>13</sup> C-POC<br>/‰ VPDB | DIC<br>/μmol L <sup>-1</sup> | pCO2<br>/ppmV | Discharge<br>/L s <sup>-1</sup> |
|-----------|--------------------------------|-------------------------|---------------------------|----------|------|----------------------------|-----------|---------------------------------------------|----------------------------------|----------------------------------|------------------------------|---------------|---------------------------------|
| 1-UHL     | 24-Sep-2014                    | 9.3                     | 93                        | 10.9     | 5.76 | 37                         | 342       | 1.2                                         | -20.9                            | -29.3                            | 89                           | 1419          | 50.8                            |
| 2-UHL     | 29-Oct-2014                    | 9.7                     | 89                        | 7.7      | 6.20 | 53                         | 301       | 8.9                                         | -21.6                            | -29.8                            | 196                          | 2217          | 21.5                            |
| 3-UHL     | 12-Dec-2014                    | 10.8                    | 91                        | 3.0      | 6.48 | 70                         | 198       | 11.5                                        | -15.6                            | -29.1                            | 198                          | 1523          | 27.0                            |
| 4-UHL     | 20-Jan-2015                    | 11.3                    | 40                        | 1.9      | 6.02 | 51                         | 122       | 9.0                                         | -20.0                            | -29.5                            | 143                          | 1530          | 25.6                            |
| 4.1 UHL   | 16-Feb-2015                    |                         |                           | 4.0      | 6.30 | 55                         |           |                                             | -16.7                            | -29.7                            | 137                          | 1290          | 17.5                            |
| 5-UHL     | 18-Feb-2015                    | 10.5                    | 86                        | 4.3      | 6.16 | 54                         | 89        | 7.0                                         | -16.5                            | -29.8                            | 261                          | 2763          | 16.3                            |
| 5.1 UHL   | 28-Feb-2015                    |                         |                           | 4.4      | 5.90 | 56                         |           |                                             | -15.7                            | -29.7                            | 134                          | 1647          | 14.9                            |
| 5.2 UHL   | 7-Mar-2015                     |                         |                           | 2.5      | 5.89 | 53                         |           |                                             | -14.7                            | -29.1                            | 120                          | 1392          | 16.0                            |
| 5.3 UHL   | 12-Mar-2015                    |                         |                           | 3.8      | 5.23 | 31                         |           |                                             | -21.2                            | -29.7                            | 49                           | 694           | 40.1                            |
| 5.4 UHL   | 16-Mar-2015                    |                         |                           | 3.8      | 5.88 | 46                         |           |                                             | -18.2                            | -29.1                            | 100                          | 1216          | 36.3                            |
| 6-UHL     | 17-Mar-2015                    | 11.2                    | 91                        | 3.2      | 4.97 | 36                         | 95        | 3.2                                         | -21.3                            | -29.3                            | 65                           | 920           | 125.8                           |
| 6.1 UHL   | 22-Mar-2015                    |                         |                           | 3.5      | 5.38 | 40                         |           |                                             | -20.2                            | -29.1                            | 86                           | 1182          | 34.5                            |
| 6.2 UHL   | 29-Mar-2015                    |                         |                           | 4.5      | 4.46 | 34                         |           |                                             | -21.5                            | -28.9                            | 58                           | 878           | 107.2                           |
| 7-UHL     | 31-Mar-2015                    | 11.8                    | 94                        | 0.9      | 4.87 | 38                         | 197       | 2.6                                         | -17.5                            | -29.9                            | 141                          | 1838          | 138.4                           |
| 7.1 UHL   | 1-Apr-2015                     |                         |                           | 2.0      | 4.50 | 36                         |           |                                             | -23.7                            | -30.2                            | 57                           | 785           | 109.3                           |
| 7.2 UHL   | 10-Apr-2015                    |                         |                           | 4.0      | 4.50 | 33                         |           |                                             | -18.4                            | -28.9                            | 46                           | 683           | 111.8                           |
| 7.3 UHL   | 12-Apr-2015                    |                         |                           | 2.0      | 4.40 | 36                         |           |                                             | -24.1                            | -29.4                            | 40                           | 552           | 137.3                           |
| 7.4 UHL   | 18-Apr-2015                    |                         |                           | 2.0      | 5.01 | 37                         |           |                                             | -22.1                            | -29.6                            | 88                           | 1188          | 47.7                            |
| 8-UHL     | 22-Apr-2015                    | 11.3                    | 96                        | 5.1      | 6.12 | 46                         | 91        | 6.3                                         | -18.5                            | -30.2                            | 136                          | 1514          | 29.7                            |
| 8.1. UHL  | 22-Apr-2015                    |                         |                           | 3.0      | 5.87 | 45                         |           |                                             | -18.5                            | -28.8                            | 92                           | 1094          | 29.7                            |
| 8.2. UHL  | 30-Apr-2015                    |                         |                           | 3.0      | 5.71 | 41                         |           |                                             | -18.5                            | -29.0                            | 107                          | 1345          | 40.3                            |
| 8.3. UHL  | 7-May-2015                     |                         |                           | 6.5      | 5.42 | 35                         |           |                                             | -21.3                            | -29.0                            | 94                           | 1424          | 34.5                            |
| 8.4 UHL   | 17-May-2015                    |                         |                           | 6.0      | 5.76 | 55                         |           |                                             | -16.7                            | -29.2                            | 156                          | 2134          | 16.5                            |
| 8.5. UHL  | 21-May-2015                    |                         |                           | 7.0      | 6.02 | 50                         |           |                                             | -16.7                            | -29.6                            | 209                          | 2619          | 16.2                            |
| 9-UHL     | 26-May-2015                    | 9.9                     | 96                        | 8.1      | 6.46 | 62                         | 90        | 8.5                                         | -15.2                            | -29.4                            | 175                          | 1562          | 15.0                            |
| 9.1. UHL  | 1-Jun-2015                     |                         |                           | 8.9      | 6.11 | 60                         |           |                                             | -15.9                            | -29.9                            | 175                          | 2180          | 13.7                            |
| 9.2. UHL  | 4-Jun-2015                     |                         |                           | 10.2     | 6.08 | 60                         |           |                                             | -16.5                            | -29.9                            | 182                          | 2407          | 12.6                            |
| 9.3. UHL  | 15-Jun-2015                    |                         |                           | 11.3     | 6.25 | 62                         |           |                                             | -15.9                            | -29.9                            | 184                          | 2194          | 12.1                            |
| 10-UHL    | 17-Jun-2015                    | 10.4                    | 99                        | 9.2      | 6.29 | 63                         | 92        | 10.9                                        | -15.0                            | -28.8                            | 195                          | 2120          | 12.0                            |
| 10.3 UHL  | 1-Jul-2015                     |                         |                           | 10.0     | 6.14 | 11                         |           |                                             | -18.5                            | -29.1                            | 167                          | 2105          | 12.3                            |
| 10.4 UHL  | 9-Jul-2015                     |                         |                           | 10.0     | 5.80 | 10                         |           |                                             | -15.7                            | -29.2                            | 193                          | 2948          | 12.0                            |
| 10.5 UHL  | 13-Jul-2015                    |                         |                           | 11.2     | 5.97 |                            |           |                                             | -15.3                            | -29.1                            | 197                          | 2869          | 12.7                            |
| 11-UHL    | 14-Jul-2015                    | 9.2                     | 96                        | 11.9     | 6.44 | 62                         | 82        | 9.8                                         | -15.2                            | -29.5                            | 192                          | 1910          | 13.0                            |
| 11.1 UHL  | 23-Jul-2015                    |                         |                           | 12.0     | 6.45 |                            |           |                                             | -16.2                            | -29.4                            | 225                          | 2223          | 10.5                            |
| 11.2 UHL  | 1-Aug-2015                     |                         |                           | 11.4     | 6.52 |                            |           |                                             | -15.3                            | -29.6                            | 222                          | 1990          | 9.9                             |
| 11.3 UHL  | 6-Aug-2015                     |                         |                           | 12.2     | 6.25 |                            |           |                                             | -15.6                            | -29.3                            | 233                          | 2841          | 9.6                             |
| 11.4 UHL  | 13-Aug-2015                    |                         |                           | 13.8     | 6.37 |                            |           |                                             | -14.6                            | -29.3                            | 214                          | 2409          | 9.3                             |
| 12-UHL    | 19-Aug-2015                    | 9.0                     | 95                        | 13.0     | 5.86 | 67                         | 98        | 2.7                                         | -22.4                            | -28.4                            | 95                           | 1538          | 47.0                            |
| 12.1 UHL  | 18-Aug-2015                    |                         |                           | 12.0     | 6.08 |                            |           |                                             | -17.7                            | -28.3                            | 270                          | 3749          | 32.0                            |
| 12.2 UHL  | 26-Aug-2015                    |                         |                           | 11.5     | 6.64 |                            |           |                                             | -15.2                            | -28.4                            | 184                          | 1410          | 9.7                             |
| 12.3 UHL  | 31-Aug-2015                    |                         |                           | 11.0     | 6.59 |                            |           |                                             | -13.5                            | -28.9                            | 244                          | 1981          | 9.0                             |

|          |             |      |    |      |      |    |     |      |  |       |       |     |      |       |
|----------|-------------|------|----|------|------|----|-----|------|--|-------|-------|-----|------|-------|
| 12.4 UHL | 7-Sep-2015  |      |    | 9.7  | 6.06 |    |     |      |  | -16.6 | -28.0 | 85  | 1123 | 28.3  |
| 12.5 UHL | 16-Sep-2015 |      |    | 11.5 | 6.02 |    |     |      |  | -14.4 | -29.0 | 199 | 2836 | 9.8   |
| 13-UHL   | 24-Sep-2015 | 10.0 | 97 | 8.9  | 7.09 | 66 | 99  | 13.5 |  | -14.0 | -29.1 | 210 | 733  | 10.9  |
| 13.1 UHL | 25-Sep-2015 |      |    | 8.6  | 6.64 |    |     |      |  | -15.3 | -28.5 | 483 | 3485 | 9.8   |
| 13.2 UHL | 30-Sep-2015 |      |    | 5.0  | 6.33 |    |     |      |  | -14.1 | -28.5 | 172 | 1621 | 9.0   |
| 13.3UHL  | 6-Oct-2015  |      |    | 8.4  | 6.57 |    |     |      |  | -14.2 | -28.3 | 172 | 1355 | 9.0   |
| 13.4 UHL | 16-Oct-2015 |      |    | 8.0  | 6.34 |    |     |      |  | -16.9 | -28.0 | 90  | 908  | 27.8  |
| 13.5 UHL | 17-Oct-2015 |      |    | 8.0  | 5.43 |    |     |      |  | -21.7 | -27.5 | 64  | 1020 | 36.7  |
| 14-UHL   | 21-Oct-2015 | 10.7 | 95 | 6.4  | 5.88 | 66 | 158 | 25.0 |  | -20.3 | -29.9 | 77  | 2774 | 37.2  |
| 14.5 UHL | 1-Nov-2015  |      |    | 8.0  | 6.35 | 70 |     |      |  | -14.1 | -30.2 | 176 | 1759 | 9.7   |
| 14.6 UHL | 11-Nov-2015 |      |    | 6.5  | 5.48 | 62 |     |      |  | -25.2 | -28.8 | 96  | 1440 | 30.3  |
| 14.7 UHL | 16-Nov-2015 |      |    | 6.0  | 3.92 | 62 |     |      |  | -23.9 | -28.2 | 38  | 612  | 528.8 |
| 14.8 UHL | 23-Nov-2015 |      |    | 5.0  | 4.99 | 55 |     |      |  | -22.3 | -29.4 | 74  | 1118 | 25.6  |
| 15-UHL   | 25-Nov-2015 | 11.1 | 92 | 2.8  | 5.89 | 71 | 187 | 7.5  |  | -19.4 | -29.2 | 133 | 1558 | 17.6  |
| 15.1 UHL | 30-Nov-2015 |      |    | 5.0  | 4.62 | 57 |     |      |  | -22.8 | -28.4 | 58  | 891  | 117.1 |
| 15.2 UHL | 7-Dec-2015  |      |    | 5.6  | 5.20 | 54 |     |      |  | -19.7 | -30.0 | 84  | 1274 | 26.8  |
| 15.3 UHL | 15-Dec-2015 |      |    | 5.8  | 5.97 | 56 |     |      |  | -18.8 | -29.2 | 108 | 1341 | 23.5  |
| 16-UHL   | 17-Dec-2015 | 11.3 | 93 | 4.0  | 6.10 | 57 | 179 | 0.2  |  | -18.4 | -29.9 | 133 | 1448 | 27.9  |
| 16.1 UHL | 21-Dec-2015 |      |    | 5.2  | 5.61 | 54 |     |      |  | -19.1 | -29.7 | 73  | 1017 | 30.7  |
| 16.2 UHL | 28-Dec-2015 |      |    | 5.1  | 6.12 | 59 |     |      |  | -17.8 | -30.2 | 128 | 1425 | 26.2  |
| 16.3 UHL | 30-Dec-2015 |      |    | 3.3  | 5.65 | 58 |     |      |  | -17.6 | -29.5 | 105 | 1356 | 23.5  |
| 16.4 UHL | 6-Jan-2016  |      |    | 2.0  | 6.30 | 64 |     |      |  | -16.5 | -30.2 | 167 | 1487 | 16.8  |
| 16.5 UHL | 11-Jan-2016 |      |    | 3.0  | 6.36 | 61 |     |      |  | -10.1 | -29.9 | 94  | 817  | 24.1  |
| 16.6 UHL | 18-Jan-2016 |      |    | 0.8  | 6.26 | 64 |     |      |  | -16.3 | -30.2 | 162 | 1438 | 16.6  |
| 17-UHL   | 21-Jan-2016 | 12.6 | 94 | -0.1 | 6.57 | 54 | 135 | 8.5  |  | -16.7 | -30.4 | 202 | 1305 | 15.8  |
| 17.1 UHL | 26-Jan-2016 |      |    | 1.8  | 4.28 | 52 |     |      |  | -23.1 | -28.9 | 58  | 795  | 173.5 |
| 17.2 UHL | 2-Feb-2016  |      |    | 2.5  | 4.19 | 48 |     |      |  | -23.0 | -29.2 | 50  | 705  | 197.4 |
| 17.3 UHL | 9-Feb-2016  |      |    | 3.0  | 4.80 | 45 |     |      |  | -21.3 | -30.1 | 66  | 928  | 76.7  |
| 17.4 UHL | 16-Feb-2016 |      |    | 2.5  | 5.72 | 51 |     |      |  | -22.2 | -30.5 | 121 | 1484 | 31.0  |
| 18-UHL   | 17-Feb-2016 | 12.6 | 97 | 1.2  | 6.33 | 52 | 157 | 1.8  |  | -18.6 | -30.1 | 128 | 1087 | 27.5  |
| 18.2 UHL | 24-Feb-2016 |      |    | 2.0  | 4.84 | 40 |     |      |  | -24.1 |       | 45  | 613  | 67.2  |
| 18.3 UHL | 1-Mar-2016  |      |    | 2.5  | 5.86 | 52 |     |      |  | -19.5 | -29.3 | 74  | 869  | 32.5  |
| 18.4 UHL | 6-Mar-2016  |      |    | 2.8  | 5.56 | 52 |     |      |  | -19.0 | -28.9 | 92  | 1193 | 30.6  |
| 18.5 UHL | 14-Mar-2016 |      |    | 2.5  | 6.29 | 55 |     |      |  | -16.8 |       | 103 | 938  | 22.8  |
| 18.6 UHL | 22-Mar-2016 |      |    | 3.0  | 5.92 | 52 |     |      |  | -17.5 | -29.3 | 98  | 1141 | 26.9  |
| 18.7 UHL | 29-Mar-2016 |      |    |      | 4.52 | 42 |     |      |  | -23.7 | -29.1 | 48  | 682  | 135.1 |
| 19-UHL   | 30-Mar-2016 | 11.6 | 95 | 2.8  | 5.53 | 51 | 222 | 1.2  |  | -22.3 | -29.4 | 74  | 966  | 86.4  |
| 19.4 UHL | 3-Apr-2016  |      |    |      | 4.69 | 39 |     |      |  | -24.1 | -28.9 | 31  |      | 104.6 |
| 19.5 UHL | 8-Apr-2016  |      |    | 4.5  | 4.90 | 35 |     |      |  | -22.6 | -29.5 | 57  | 850  | 74.1  |
| 19.6 UHL | 10-Apr-2016 |      |    | 3.5  | 4.45 | 39 |     |      |  | -22.6 | -29.6 | 46  | 671  | 140.0 |
| 19.7 UHL | 15-Apr-2016 |      |    | 3.0  | 4.89 | 38 |     |      |  | -22.6 |       | 58  | 819  | 72.5  |
| 19.8 UHL | 20-Apr-2016 |      |    | 4.3  | 5.83 | 53 |     |      |  | -19.5 | -29.3 | 121 | 1526 | 31.5  |
| 20-UHL   | 27-Apr-2016 | 11.5 | 96 | 2.9  | 6.65 | 45 | 154 | 4.8  |  | -18.8 | -29.8 | 103 | 648  | 35.5  |

**Table S2:** Analytical results of groundwater at sites P84, HST, and DST. For additional site information see Table S3.  
empty cells: data not available

| Sample ID       | Collection date | O <sub>2</sub> | O <sub>2</sub> | T    | pH   | EC                   | Eh  | TA                                    | δ <sup>13</sup> C-DIC | δ <sup>13</sup> C-POC | DIC                   | pCO <sub>2</sub> |
|-----------------|-----------------|----------------|----------------|------|------|----------------------|-----|---------------------------------------|-----------------------|-----------------------|-----------------------|------------------|
|                 | dd-mmm-yyyy     | /mg/L          | /%-sat.        | /°C  |      | /μS cm <sup>-1</sup> | /mV | /mg L <sup>-1</sup> CaCO <sub>3</sub> | /‰ VPDB               | /‰ VPDB               | /μmol L <sup>-1</sup> | /ppmV            |
| <u>Site P84</u> |                 |                |                |      |      |                      |     |                                       |                       |                       |                       |                  |
| 1-P84           | 25-Sep-2014     | 7.9            | 74             | 8.5  | 5.90 | 78                   | 277 | 8.0                                   | -23.8                 | -29.1                 | 500                   | 6981             |
| 2-P84           | 30-Oct-2014     | 8.3            | 73             | 6.4  | 6.04 | 81                   | 237 | 11.1                                  | -23.8                 | -29.2                 | 523                   | 6362             |
| 3-P84           | 13-Dec-2014     | 8.7            | 77             | 5.9  | 6.09 | 79                   | 238 | 8.7                                   | -22.1                 | -28.3                 | 332                   | 3859             |
| 4-P84           | 21-Jan-2015     | 8.4            | 79             | 6.9  | 5.73 | 75                   | 133 | 6.8                                   | -24.0                 | -29.4                 | 458                   | 6518             |
| 5-P84           | 19-Feb-2015     | 8.0            | 72             | 6.5  | 5.82 | 92                   | 148 | 8.2                                   | -24.3                 | -29.4                 | 523                   | 7109             |
| 6-P84           | 18-Mar-2015     | 8.1            | 73             | 7.3  | 5.62 | 0                    | 150 | 7.0                                   | -24.3                 | -29.9                 | 449                   | 6694             |
| 7-P84           | 1-Apr-2015      | 8.0            | 72             | 5.7  | 5.71 | 82                   | 143 | 8.6                                   | -24.1                 | -29.3                 | 446                   | 6143             |
| 8-P84           | 21-Apr-2015     | 8.2            | 75             | 7.0  | 5.04 | 76                   | 52  | 9.5                                   | -24.8                 | -29.5                 | 443                   | 7162             |
| 9-P84           | 27-May-2015     | 8.5            | 75             | 6.2  | 5.76 | 77                   | 118 | 6.5                                   | -24.3                 | -29.8                 | 434                   | 5976             |
| 10-P84          | 17-Jun-2015     | 8.0            | 72             | 6.6  | 6.74 | 78                   | 91  | 7.8                                   | -24.2                 | -28.5                 | 458                   | 2753             |
| 11-P84          | 15-Jul-2015     | 7.5            | 72             | 8.4  | 5.95 | 77                   | 144 | 7.7                                   | -25.0                 | -28.4                 | 461                   | 6258             |
| 12-P84          | 19-Aug-2015     | 6.6            | 65             | 9.6  | 5.89 | 78                   | 112 | 9.5                                   | -24.4                 | -29.2                 | 540                   | 7829             |
| 13-P84          | 25-Sep-2015     | 8.2            | 78             | 8.7  | 7.28 | 78                   | 91  | 11.0                                  | -23.2                 | -28.1                 | 406                   | 979              |
| 14-P84          | 22-Oct-2015     | 7.8            | 72             | 7.9  | 5.92 | 86                   | 160 | 10.3                                  | -23.7                 | -28.4                 | 299                   | 4060             |
| 15-P84          | 26-Nov-2015     | 6.2            | 56             | 6.9  | 5.74 | 87                   | 142 | 6.0                                   | -24.6                 |                       | 449                   | 6368             |
| 16-P84          | 18-Dec-2015     | 7.9            | 72             | 7.6  | 5.77 | 75                   | 111 | 6.0                                   | -23.5                 |                       | 458                   | 6572             |
| 17-P84          | 22-Jan-2016     | 9.8            | 79             | 3.3  | 5.88 | 81                   | 87  | 8.0                                   | -23.5                 |                       | 404                   | 4831             |
| 18-P84          | 18-Feb-2016     | 8.6            | 75             | 5.6  | 5.75 | 81                   | 172 | 7.5                                   | -24.3                 | -29.7                 | 455                   | 6165             |
| 19-P84          | 31-Mar-2016     | 7.9            | 72             | 6.3  | 6.32 | 74                   | 115 | 6.1                                   | -24.9                 |                       | 423                   | 4163             |
| 20-P84          | 27-Apr-2016     | 8.4            | 73             | 5.3  | 6.23 | 71                   | 173 | 5.5                                   | -24.7                 |                       | 409                   | 4229             |
| <u>Site HST</u> |                 |                |                |      |      |                      |     |                                       |                       |                       |                       |                  |
| 1-HST           | 25-Sep-2014     | 6.9            | 65             | 8.8  | 5.85 | 83                   | 356 | 8.5                                   | -24.5                 | -28.2                 | 478                   | 6885             |
| 2-HST           | 30-Oct-2014     | 7.2            | 66             | 7.6  | 5.90 | 86                   | 232 | 13.0                                  | -25.0                 | -28.5                 | 500                   | 6793             |
| 3-HST           | 13-Dec-2014     | 6.7            | 52             | 6.2  | 5.99 | 84                   | 268 | 8.9                                   | -23.7                 | -27.5                 | 414                   | 5150             |
| 4-HST           | 21-Jan-2015     | 7.6            | 66             | 4.6  | 5.90 | 82                   | 142 | 6.0                                   | -24.1                 | -28.4                 | 383                   | 4737             |
| <u>HST</u>      |                 |                |                |      |      |                      |     |                                       |                       |                       |                       |                  |
| 6-HST           | 18-Mar-2015     | 5.6            | 49             | 6.5  | 5.83 | 84                   | 146 | 17.5                                  | -24.6                 | -28.9                 | 446                   | 6038             |
| 7-HST           | 1-Apr-2015      | 6.7            | 58             | 4.3  | 5.78 | 85                   | 109 | 11.9                                  | -24.6                 | -29.0                 | 435                   | 5587             |
| 8-HST           | 21-Apr-2015     | 7.0            | 64             | 6.5  | 5.66 | 81                   | 51  | 10.3                                  | -24.8                 | -29.0                 | 453                   | 6504             |
| 9-HST           | 27-May-2015     | 7.6            | 67             | 5.8  | 5.88 | 94                   | 82  | 6.7                                   | -24.3                 | -28.5                 | 415                   | 5380             |
| 10-HST          | 17-Jun-2015     | 6.4            | 61             | 8.5  | 6.40 | 81                   | 86  | 15.0                                  | -24.8                 | -29.1                 | 380                   | 3655             |
| 11-HST          | 15-Jul-2015     | 5.5            | 54             | 9.8  | 6.03 | 92                   | 111 | 8.0                                   | -24.9                 | -28.6                 | 509                   | 6874             |
| 12-HST          | 19-Aug-2015     | 5.9            | 58             | 11.3 | 5.80 | 134                  | 136 | 9.0                                   | -24.4                 | -29.3                 | 495                   | 7860             |
| 13-HST          | 25-Sep-2015     | 6.4            | 65             | 10.1 | 5.55 | 83                   | 101 | 9.0                                   | -24.0                 | -28.1                 | 436                   | 7246             |
| 14-HST          | 22-Oct-2015     | 6.4            | 59             | 7.9  | 5.97 | 86                   | 141 | 11.1                                  | -24.4                 | -25.6                 | 391                   | 5174             |
| 15-HST          | 26-Nov-2015     | 5.0            | 45             | 5.4  | 5.91 | 87                   | 117 | 10.1                                  | -27.0                 |                       | 349                   | 4408             |
| 16-HST          | 18-Dec-2015     | 6.1            | 54             | 6.4  | 5.95 | 83                   | 140 | 9.0                                   | -23.6                 |                       | 481                   | 6147             |
| 17-HST          | 22-Jan-2016     | 7.0            | 60             | 4.9  | 5.92 | 84                   | 102 | 12.0                                  | -24.0                 |                       | 420                   | 5197             |
| 18-HST          | 18-Feb-2016     | 8.2            | 72             | 5.9  | 5.80 | 86                   | 178 | 8.0                                   | -24.3                 | -29.8                 | 424                   | 5698             |

|                 |             |     |    |      |      |    |     |      |       |       |     |      |
|-----------------|-------------|-----|----|------|------|----|-----|------|-------|-------|-----|------|
| 19-HST          | 31-Mar-2016 | 7.8 | 67 | 4.9  | 6.10 | 81 | 116 | 8.0  | -25.4 |       | 410 | 4597 |
| 20-HST          | 27-Apr-2016 | 9.0 | 78 | 4.8  | 6.03 | 78 | 236 | 8.2  | -25.0 |       | 378 | 4407 |
| <u>Site DST</u> |             |     |    |      |      |    |     |      |       |       |     |      |
| 2-DST           | 30-Oct-2014 |     |    |      |      |    |     |      | -24.2 | -28.3 | 475 |      |
| 3-DST           | 13-Dec-2014 |     |    |      |      |    |     |      | -22.9 | -28.3 | 322 |      |
| 4-DST           | 21-Jan-2015 | 7.8 | 68 | 4.8  | 5.87 | 89 | 120 |      | -22.8 | -29.1 | 340 | 4288 |
| 5-DST           | 19-Feb-2015 | 8.2 | 67 | 3.1  | 5.85 | 82 | 179 |      | -22.9 | -29.5 | 447 | 5375 |
| 6-DST           | 18-Mar-2015 | 7.2 | 64 | 6.6  | 5.84 | 83 | 140 | 7.5  | -22.6 |       | 322 | 4355 |
| 7-DST           | 1-Apr-2015  | 7.3 | 64 | 5.0  | 5.72 | 77 | 131 | 7.8  | -22.1 | -29.2 | 284 | 3810 |
| 8-DST           | 23-Apr-2015 | 7.0 | 71 | 10.4 | 5.71 | 76 | 83  | 8.0  | -24.0 | -29.1 | 435 | 6959 |
| 9-DST           | 27-May-2015 | 7.5 | 66 | 5.8  | 5.65 | 80 | 102 | 8.3  | -23.4 | -29.3 | 425 | 5979 |
| 10-DST          | 17-Jun-2015 | 7.5 | 69 | 7.2  | 6.38 | 82 | 80  | 12.2 | -23.5 | -28.5 | 428 | 4069 |
| 11-DST          | 15-Jul-2015 | 6.7 | 63 | 8.0  | 5.77 | 80 | 145 | 8.2  | -23.9 | -28.0 | 477 | 6931 |
| 12-DST          | 19-Aug-2015 | 6.4 | 65 | 10.8 | 6.13 | 79 | 145 | 6.5  | -22.4 | -28.7 | 391 | 5073 |
| 13-DST          | 25-Sep-2015 | 6.1 | 59 | 9.1  | 7.32 | 78 | 95  | 11.0 | -23.6 | -27.7 | 482 | 1079 |
| 14-DST          | 22-Oct-2015 | 7.3 | 67 | 7.7  | 5.71 | 81 | 139 | 8.9  | -22.8 | -27.6 | 392 | 5762 |
| 15-DST          | 26-Nov-2015 | 7.7 | 68 | 6.3  | 5.92 | 81 | 159 | 4.1  | -23.2 |       | 343 | 4435 |
| 16-DST          | 18-Dec-2015 | 7.7 | 69 | 5.9  | 6.50 | 81 | 139 | 8.0  | -22.8 |       | 401 | 3249 |
| 17-DST          | 22-Jan-2016 | 7.7 | 63 | 4.1  | 5.99 | 81 | 127 | 6.0  | -22.9 |       | 399 | 4651 |
| 18-DST          | 18-Feb-2016 | 7.5 | 65 | 5.2  | 6.13 | 80 | 190 | 9.0  | -23.1 | -29.8 | 455 | 5047 |
| 19-DST          | 31-Mar-2016 | 7.1 | 62 | 5.6  | 6.37 | 78 | 145 | 7.1  | -24.0 |       | 386 | 3561 |
| 20-DST          | 27-Apr-2016 | 8.0 | 70 | 4.9  | 6.19 | 76 | 203 | 7.5  | -23.9 |       | 393 | 4145 |

**Table S3:** Sampling site information at the Uhlirska catchment. Total catchment area is 1.78 km<sup>2</sup>.

| Sample site ID | type         | well depth /m | Altitude / masl | Latitude (°N) | Longitude (°E) | comment                  |
|----------------|--------------|---------------|-----------------|---------------|----------------|--------------------------|
| UHL            | stream water | -             | 777             | 50.824079     | 15.147292      | weir at catchment outlet |
| HST            | groundwater  | 2.7           | 797             | 50.832283     | 15.149773      | well                     |
| DST            | groundwater  | 3.7           | 803             | 50.832301     | 15.150270      | well                     |
| P84            | groundwater  | 5.2           | 803             | 50.832292     | 15.150270      | well                     |

**Table S4:** Model input file with annual mean POC as Delta13POC for data from September 2014 to April 2016.

| <i>Input file</i> |      |             |                     |         |      |            |            |                |                     |          |  |
|-------------------|------|-------------|---------------------|---------|------|------------|------------|----------------|---------------------|----------|--|
| Temperatureriver  | K600 | Riverheight | ProportionSilicates | DICSiCa | pCO2 | Delta13DIC | Delta13POC | ProportionAcid | ProportionRespRiver | d13CDIC* |  |
| 10.9              | 1    | 1           | 1                   | 0.024   | 1419 | -20.91     | -29.5      | 0              | 0.1                 | -25.14   |  |
| 7.7               | 1    | 1           | 1                   | 0.178   | 2217 | -21.62     | -29.5      | 0              | 0.1                 | -25.34   |  |
| 3.0               | 1    | 1           | 1                   | 0.230   | 1523 | -15.59     | -29.5      | 0              | 0.1                 | -23.92   |  |
| 1.9               | 1    | 1           | 1                   | 0.180   | 1530 | -20.02     | -29.5      | 0              | 0.1                 | -24.60   |  |
| 4.0               | 1    | 1           | 1                   | 0.145   | 1290 | -16.71     | -29.5      | 0              | 0.1                 | -24.60   |  |
| 4.3               | 1    | 1           | 1                   | 0.140   | 2763 | -16.46     | -29.5      | 0              | 0.1                 | -24.60   |  |
| 4.4               | 1    | 1           | 1                   | 0.112   | 1647 | -15.69     | -29.5      | 0              | 0.1                 | -24.69   |  |
| 2.5               | 1    | 1           | 1                   | 0.092   | 1392 | -14.68     | -29.5      | 0              | 0.1                 | -24.76   |  |
| 3.8               | 1    | 1           | 1                   | 0.078   | 694  | -21.22     | -29.5      | 0              | 0.1                 | -24.80   |  |
| 3.8               | 1    | 1           | 1                   | 0.067   | 1216 | -18.17     | -29.5      | 0              | 0.1                 | -24.84   |  |
| 3.2               | 1    | 1           | 1                   | 0.064   | 920  | -21.34     | -29.5      | 0              | 0.1                 | -24.85   |  |
| 3.5               | 1    | 1           | 1                   | 0.060   | 1182 | -20.15     | -29.5      | 0              | 0.1                 | -24.76   |  |
| 4.5               | 1    | 1           | 1                   | 0.054   | 878  | -21.47     | -29.5      | 0              | 0.1                 | -24.64   |  |
| 0.9               | 1    | 1           | 1                   | 0.052   | 1838 | -17.50     | -29.5      | 0              | 0.1                 | -24.61   |  |
| 2.0               | 1    | 1           | 1                   | 0.055   | 785  | -23.74     | -29.5      | 0              | 0.1                 | -24.65   |  |
| 4.0               | 1    | 1           | 1                   | 0.086   | 683  | -18.38     | -29.5      | 0              | 0.1                 | -25.03   |  |
| 2.0               | 1    | 1           | 1                   | 0.092   | 552  | -24.09     | -29.5      | 0              | 0.1                 | -25.12   |  |
| 2.0               | 1    | 1           | 1                   | 0.113   | 1188 | -22.08     | -29.5      | 0              | 0.1                 | -25.37   |  |
| 5.1               | 1    | 1           | 1                   | 0.126   | 1514 | -18.53     | -29.5      | 0              | 0.1                 | -25.54   |  |
| 3.0               | 1    | 1           | 1                   | 0.126   | 1094 | -18.51     | -29.5      | 0              | 0.1                 | -25.54   |  |
| 3.0               | 1    | 1           | 1                   | 0.136   | 1345 | -18.50     | -29.5      | 0              | 0.1                 | -25.42   |  |
| 6.5               | 1    | 1           | 1                   | 0.145   | 1424 | -21.26     | -29.5      | 0              | 0.1                 | -25.31   |  |
| 6.0               | 1    | 1           | 1                   | 0.158   | 2134 | -16.74     | -29.5      | 0              | 0.1                 | -25.16   |  |
| 7.0               | 1    | 1           | 1                   | 0.164   | 2619 | -16.71     | -29.5      | 0              | 0.1                 | -25.10   |  |
| 8.1               | 1    | 1           | 1                   | 0.170   | 1562 | -15.15     | -29.5      | 0              | 0.1                 | -25.02   |  |
| 8.9               | 1    | 1           | 1                   | 0.183   | 2180 | -15.88     | -29.5      | 0              | 0.1                 | -25.07   |  |
| 10.2              | 1    | 1           | 1                   | 0.190   | 2407 | -16.49     | -29.5      | 0              | 0.1                 | -25.09   |  |

|      |   |   |   |       |       |        |       |   |     |        |
|------|---|---|---|-------|-------|--------|-------|---|-----|--------|
| 11.3 | 1 | 1 | 1 | 0.214 | 2194  | -15.90 | -29.5 | 0 | 0.1 | -25.18 |
| 9.2  | 1 | 1 | 1 | 0.218 | 2120  | -15.01 | -29.5 | 0 | 0.1 | -25.20 |
| 10.0 | 1 | 1 | 1 | 0.207 | 2105  | -18.45 | -29.5 | 0 | 0.1 | -25.40 |
| 10.0 | 1 | 1 | 1 | 0.200 | 2948  | -15.70 | -29.5 | 0 | 0.1 | -25.51 |
| 11.2 | 1 | 1 | 1 | 0.197 | 2869  | -15.33 | -29.5 | 0 | 0.1 | -25.57 |
| 11.9 | 1 | 1 | 1 | 0.196 | 1910  | -15.16 | -29.5 | 0 | 0.1 | -25.59 |
| 12.0 | 1 | 1 | 1 | 0.161 | 2223  | -16.16 | -29.5 | 0 | 0.1 | -25.38 |
| 11.4 | 1 | 1 | 1 | 0.125 | 1990  | -15.34 | -29.5 | 0 | 0.1 | -25.16 |
| 12.2 | 1 | 1 | 1 | 0.105 | 2841  | -15.59 | -29.5 | 0 | 0.1 | -25.05 |
| 13.8 | 1 | 1 | 1 | 0.078 | 2409  | -14.56 | -29.5 | 0 | 0.1 | -24.88 |
| 13.0 | 1 | 1 | 1 | 0.054 | 1538  | -22.36 | -29.5 | 0 | 0.1 | -24.74 |
| 12.0 | 1 | 1 | 1 | 0.058 | 3749  | -17.71 | -29.5 | 0 | 0.1 | -24.76 |
| 11.5 | 1 | 1 | 1 | 0.096 | 1410  | -15.15 | -29.5 | 0 | 0.1 | -24.71 |
| 11.0 | 1 | 1 | 1 | 0.126 | 1981  | -13.46 | -29.5 | 0 | 0.1 | -24.69 |
| 9.7  | 1 | 1 | 1 | 0.168 | 1123  | -16.56 | -29.5 | 0 | 0.1 | -24.67 |
| 11.5 | 1 | 1 | 1 | 0.222 | 2836  | -14.39 | -29.5 | 0 | 0.1 | -24.63 |
| 8.9  | 1 | 1 | 1 | 0.270 | 732.7 | -13.98 | -29.5 | 0 | 0.1 | -24.60 |
| 8.6  | 1 | 1 | 1 | 0.279 | 3485  | -15.26 | -29.5 | 0 | 0.1 | -24.60 |
| 5.0  | 1 | 1 | 1 | 0.321 | 1621  | -14.10 | -29.5 | 0 | 0.1 | -24.60 |
| 8.4  | 1 | 1 | 1 | 0.372 | 1355  | -14.18 | -29.5 | 0 | 0.1 | -24.61 |
| 8.0  | 1 | 1 | 1 | 0.458 | 908.1 | -16.87 | -29.5 | 0 | 0.1 | -24.61 |
| 8.0  | 1 | 1 | 1 | 0.466 | 1020  | -21.74 | -29.5 | 0 | 0.1 | -24.61 |
| 6.4  | 1 | 1 | 1 | 0.500 | 2774  | -20.31 | -29.5 | 0 | 0.1 | -24.61 |
| 8.0  | 1 | 1 | 1 | 0.390 | 1759  | -14.07 | -29.5 | 0 | 0.1 | -25.03 |
| 6.5  | 1 | 1 | 1 | 0.290 | 1440  | -25.16 | -29.5 | 0 | 0.1 | -25.41 |
| 6.0  | 1 | 1 | 1 | 0.240 | 611.8 | -23.93 | -29.5 | 0 | 0.1 | -25.60 |
| 5.0  | 1 | 1 | 1 | 0.170 | 1118  | -22.31 | -29.5 | 0 | 0.1 | -25.86 |
| 2.8  | 1 | 1 | 1 | 0.150 | 1558  | -19.40 | -29.5 | 0 | 0.1 | -25.94 |
| 5.0  | 1 | 1 | 1 | 0.143 | 891.1 | -22.80 | -29.5 | 0 | 0.1 | -25.56 |
| 5.6  | 1 | 1 | 1 | 0.134 | 1274  | -19.71 | -29.5 | 0 | 0.1 | -25.04 |
| 5.8  | 1 | 1 | 1 | 0.123 | 1341  | -18.81 | -29.5 | 0 | 0.1 | -24.43 |



|      |   |   |   |       |       |        |       |   |     |        |
|------|---|---|---|-------|-------|--------|-------|---|-----|--------|
| 4.0  | 1 | 1 | 1 | 0.120 | 1448  | -18.42 | -29.5 | 0 | 0.1 | -24.28 |
| 5.2  | 1 | 1 | 1 | 0.126 | 1017  | -19.14 | -29.5 | 0 | 0.1 | -24.31 |
| 5.1  | 1 | 1 | 1 | 0.136 | 1425  | -17.78 | -29.5 | 0 | 0.1 | -24.34 |
| 3.3  | 1 | 1 | 1 | 0.139 | 1356  | -17.64 | -29.5 | 0 | 0.1 | -24.36 |
| 2.0  | 1 | 1 | 1 | 0.149 | 1487  | -16.46 | -29.5 | 0 | 0.1 | -24.39 |
| 3.0  | 1 | 1 | 1 | 0.156 | 816.8 | -10.05 | -29.5 | 0 | 0.1 | -24.42 |
| 0.8  | 1 | 1 | 1 | 0.166 | 1438  | -16.26 | -29.5 | 0 | 0.1 | -24.46 |
| -0.1 | 1 | 1 | 1 | 0.170 | 1305  | -16.71 | -29.5 | 0 | 0.1 | -24.48 |
| 1.8  | 1 | 1 | 1 | 0.145 | 794.9 | -23.06 | -29.5 | 0 | 0.1 | -24.55 |
| 2.5  | 1 | 1 | 1 | 0.110 | 704.7 | -23.03 | -29.5 | 0 | 0.1 | -24.66 |
| 3.0  | 1 | 1 | 1 | 0.076 | 928.3 | -21.32 | -29.5 | 0 | 0.1 | -24.77 |
| 2.5  | 1 | 1 | 1 | 0.041 | 1484  | -22.21 | -29.5 | 0 | 0.1 | -24.87 |
| 1.2  | 1 | 1 | 1 | 0.036 | 1087  | -18.62 | -29.5 | 0 | 0.1 | -24.89 |
| 2.0  | 1 | 1 | 1 | 0.034 | 613   | -24.14 | -29.5 | 0 | 0.1 | -25.04 |
| 2.5  | 1 | 1 | 1 | 0.032 | 868.7 | -19.54 | -29.5 | 0 | 0.1 | -25.17 |
| 2.8  | 1 | 1 | 1 | 0.031 | 1193  | -18.99 | -29.5 | 0 | 0.1 | -25.28 |
| 2.5  | 1 | 1 | 1 | 0.029 | 938.1 | -16.77 | -29.5 | 0 | 0.1 | -25.45 |
| 3.0  | 1 | 1 | 1 | 0.026 | 1141  | -17.49 | -29.5 | 0 | 0.1 | -25.63 |
| 2.8  | 1 | 1 | 1 | 0.024 | 682   | -23.71 | -29.5 | 0 | 0.1 | -25.78 |
| 2.8  | 1 | 1 | 1 | 0.024 | 965.9 | -22.29 | -29.5 | 0 | 0.1 | -25.80 |
| 3.6  | 1 | 1 | 1 | 0.034 | 450.5 | -24.12 | -29.5 | 0 | 0.1 | -25.76 |
| 4.5  | 1 | 1 | 1 | 0.047 | 850.2 | -22.62 | -29.5 | 0 | 0.1 | -25.72 |
| 3.5  | 1 | 1 | 1 | 0.052 | 671   | -22.57 | -29.5 | 0 | 0.1 | -25.70 |
| 3.0  | 1 | 1 | 1 | 0.065 | 818.7 | -22.58 | -29.5 | 0 | 0.1 | -25.66 |
| 4.3  | 1 | 1 | 1 | 0.078 | 1526  | -19.50 | -29.5 | 0 | 0.1 | -25.62 |
| 2.9  | 1 | 1 | 1 | 0.096 | 648.1 | -18.79 | -29.5 | 0 | 0.1 | -25.55 |
| 10.9 | 1 | 1 | 1 | 0.024 | 1717  | -20.91 | -29.5 | 0 | 0.1 | -25.14 |
| 7.7  | 1 | 1 | 1 | 0.178 | 2683  | -21.62 | -29.5 | 0 | 0.1 | -25.34 |
| 3.0  | 1 | 1 | 1 | 0.230 | 1843  | -15.59 | -29.5 | 0 | 0.1 | -23.92 |
| 1.9  | 1 | 1 | 1 | 0.180 | 1852  | -20.02 | -29.5 | 0 | 0.1 | -24.60 |
| 4.0  | 1 | 1 | 1 | 0.145 | 1561  | -16.71 | -29.5 | 0 | 0.1 | -24.60 |

|      |   |   |   |       |       |        |       |   |     |        |
|------|---|---|---|-------|-------|--------|-------|---|-----|--------|
| 4.3  | 1 | 1 | 1 | 0.140 | 3343  | -16.46 | -29.5 | 0 | 0.1 | -24.60 |
| 4.4  | 1 | 1 | 1 | 0.112 | 1993  | -15.69 | -29.5 | 0 | 0.1 | -24.69 |
| 2.5  | 1 | 1 | 1 | 0.092 | 1684  | -14.68 | -29.5 | 0 | 0.1 | -24.76 |
| 3.8  | 1 | 1 | 1 | 0.078 | 839.9 | -21.22 | -29.5 | 0 | 0.1 | -24.80 |
| 3.8  | 1 | 1 | 1 | 0.067 | 1471  | -18.17 | -29.5 | 0 | 0.1 | -24.84 |
| 3.2  | 1 | 1 | 1 | 0.064 | 1114  | -21.34 | -29.5 | 0 | 0.1 | -24.85 |
| 3.5  | 1 | 1 | 1 | 0.060 | 1430  | -20.15 | -29.5 | 0 | 0.1 | -24.76 |
| 4.5  | 1 | 1 | 1 | 0.054 | 1063  | -21.47 | -29.5 | 0 | 0.1 | -24.64 |
| 0.9  | 1 | 1 | 1 | 0.052 | 2224  | -17.50 | -29.5 | 0 | 0.1 | -24.61 |
| 2.0  | 1 | 1 | 1 | 0.055 | 949.3 | -23.74 | -29.5 | 0 | 0.1 | -24.65 |
| 4.0  | 1 | 1 | 1 | 0.086 | 826.5 | -18.38 | -29.5 | 0 | 0.1 | -25.03 |
| 2.0  | 1 | 1 | 1 | 0.092 | 667.4 | -24.09 | -29.5 | 0 | 0.1 | -25.12 |
| 2.0  | 1 | 1 | 1 | 0.113 | 1437  | -22.08 | -29.5 | 0 | 0.1 | -25.37 |
| 5.1  | 1 | 1 | 1 | 0.126 | 1832  | -18.53 | -29.5 | 0 | 0.1 | -25.54 |
| 3.0  | 1 | 1 | 1 | 0.126 | 1324  | -18.51 | -29.5 | 0 | 0.1 | -25.54 |
| 3.0  | 1 | 1 | 1 | 0.136 | 1628  | -18.50 | -29.5 | 0 | 0.1 | -25.42 |
| 6.5  | 1 | 1 | 1 | 0.145 | 1723  | -21.26 | -29.5 | 0 | 0.1 | -25.31 |
| 6.0  | 1 | 1 | 1 | 0.158 | 2582  | -16.74 | -29.5 | 0 | 0.1 | -25.16 |
| 7.0  | 1 | 1 | 1 | 0.164 | 3168  | -16.71 | -29.5 | 0 | 0.1 | -25.10 |
| 8.1  | 1 | 1 | 1 | 0.170 | 1890  | -15.15 | -29.5 | 0 | 0.1 | -25.02 |
| 8.9  | 1 | 1 | 1 | 0.183 | 2638  | -15.88 | -29.5 | 0 | 0.1 | -25.07 |
| 10.2 | 1 | 1 | 1 | 0.190 | 2912  | -16.49 | -29.5 | 0 | 0.1 | -25.09 |
| 11.3 | 1 | 1 | 1 | 0.214 | 2654  | -15.90 | -29.5 | 0 | 0.1 | -25.18 |
| 9.2  | 1 | 1 | 1 | 0.218 | 2566  | -15.01 | -29.5 | 0 | 0.1 | -25.20 |
| 10.0 | 1 | 1 | 1 | 0.207 | 2547  | -18.45 | -29.5 | 0 | 0.1 | -25.40 |
| 10.0 | 1 | 1 | 1 | 0.200 | 3567  | -15.70 | -29.5 | 0 | 0.1 | -25.51 |
| 11.2 | 1 | 1 | 1 | 0.197 | 3471  | -15.33 | -29.5 | 0 | 0.1 | -25.57 |
| 11.9 | 1 | 1 | 1 | 0.196 | 2311  | -15.16 | -29.5 | 0 | 0.1 | -25.59 |
| 12.0 | 1 | 1 | 1 | 0.161 | 2690  | -16.16 | -29.5 | 0 | 0.1 | -25.38 |
| 11.4 | 1 | 1 | 1 | 0.125 | 2407  | -15.34 | -29.5 | 0 | 0.1 | -25.16 |
| 12.2 | 1 | 1 | 1 | 0.105 | 3438  | -15.59 | -29.5 | 0 | 0.1 | -25.05 |

|      |   |   |   |       |       |        |       |   |     |        |
|------|---|---|---|-------|-------|--------|-------|---|-----|--------|
| 13.8 | 1 | 1 | 1 | 0.078 | 2915  | -14.56 | -29.5 | 0 | 0.1 | -24.88 |
| 13.0 | 1 | 1 | 1 | 0.054 | 1861  | -22.36 | -29.5 | 0 | 0.1 | -24.74 |
| 12.0 | 1 | 1 | 1 | 0.058 | 4537  | -17.71 | -29.5 | 0 | 0.1 | -24.76 |
| 11.5 | 1 | 1 | 1 | 0.096 | 1706  | -15.15 | -29.5 | 0 | 0.1 | -24.71 |
| 11.0 | 1 | 1 | 1 | 0.126 | 2397  | -13.46 | -29.5 | 0 | 0.1 | -24.69 |
| 9.7  | 1 | 1 | 1 | 0.168 | 1359  | -16.56 | -29.5 | 0 | 0.1 | -24.67 |
| 11.5 | 1 | 1 | 1 | 0.222 | 3432  | -14.39 | -29.5 | 0 | 0.1 | -24.63 |
| 8.9  | 1 | 1 | 1 | 0.270 | 886.5 | -13.98 | -29.5 | 0 | 0.1 | -24.60 |
| 8.6  | 1 | 1 | 1 | 0.279 | 4217  | -15.26 | -29.5 | 0 | 0.1 | -24.60 |
| 5.0  | 1 | 1 | 1 | 0.321 | 1961  | -14.10 | -29.5 | 0 | 0.1 | -24.60 |
| 8.4  | 1 | 1 | 1 | 0.372 | 1640  | -14.18 | -29.5 | 0 | 0.1 | -24.61 |
| 8.0  | 1 | 1 | 1 | 0.458 | 1099  | -16.87 | -29.5 | 0 | 0.1 | -24.61 |
| 8.0  | 1 | 1 | 1 | 0.466 | 1234  | -21.74 | -29.5 | 0 | 0.1 | -24.61 |
| 6.4  | 1 | 1 | 1 | 0.500 | 3357  | -20.31 | -29.5 | 0 | 0.1 | -24.61 |
| 8.0  | 1 | 1 | 1 | 0.390 | 2128  | -14.07 | -29.5 | 0 | 0.1 | -25.03 |
| 6.5  | 1 | 1 | 1 | 0.290 | 1743  | -25.16 | -29.5 | 0 | 0.1 | -25.41 |
| 6.0  | 1 | 1 | 1 | 0.240 | 740.2 | -23.93 | -29.5 | 0 | 0.1 | -25.60 |
| 5.0  | 1 | 1 | 1 | 0.170 | 1353  | -22.31 | -29.5 | 0 | 0.1 | -25.86 |
| 2.8  | 1 | 1 | 1 | 0.150 | 1885  | -19.40 | -29.5 | 0 | 0.1 | -25.94 |
| 5.0  | 1 | 1 | 1 | 0.143 | 1078  | -22.80 | -29.5 | 0 | 0.1 | -25.56 |
| 5.6  | 1 | 1 | 1 | 0.134 | 1541  | -19.71 | -29.5 | 0 | 0.1 | -25.04 |
| 5.8  | 1 | 1 | 1 | 0.123 | 1623  | -18.81 | -29.5 | 0 | 0.1 | -24.43 |
| 4.0  | 1 | 1 | 1 | 0.120 | 1752  | -18.42 | -29.5 | 0 | 0.1 | -24.28 |
| 5.2  | 1 | 1 | 1 | 0.126 | 1231  | -19.14 | -29.5 | 0 | 0.1 | -24.31 |
| 5.1  | 1 | 1 | 1 | 0.136 | 1724  | -17.78 | -29.5 | 0 | 0.1 | -24.34 |
| 3.3  | 1 | 1 | 1 | 0.139 | 1641  | -17.64 | -29.5 | 0 | 0.1 | -24.36 |
| 2.0  | 1 | 1 | 1 | 0.149 | 1800  | -16.46 | -29.5 | 0 | 0.1 | -24.39 |
| 3.0  | 1 | 1 | 1 | 0.156 | 988.4 | -10.05 | -29.5 | 0 | 0.1 | -24.42 |
| 0.8  | 1 | 1 | 1 | 0.166 | 1740  | -16.26 | -29.5 | 0 | 0.1 | -24.46 |
| -0.1 | 1 | 1 | 1 | 0.170 | 1580  | -16.71 | -29.5 | 0 | 0.1 | -24.48 |
| 1.8  | 1 | 1 | 1 | 0.145 | 961.8 | -23.06 | -29.5 | 0 | 0.1 | -24.55 |

|      |   |   |   |       |       |        |       |   |     |        |
|------|---|---|---|-------|-------|--------|-------|---|-----|--------|
| 2.5  | 1 | 1 | 1 | 0.110 | 852.7 | -23.03 | -29.5 | 0 | 0.1 | -24.66 |
| 3.0  | 1 | 1 | 1 | 0.076 | 1123  | -21.32 | -29.5 | 0 | 0.1 | -24.77 |
| 2.5  | 1 | 1 | 1 | 0.041 | 1796  | -22.21 | -29.5 | 0 | 0.1 | -24.87 |
| 1.2  | 1 | 1 | 1 | 0.036 | 1315  | -18.62 | -29.5 | 0 | 0.1 | -24.89 |
| 2.0  | 1 | 1 | 1 | 0.034 | 741.7 | -24.14 | -29.5 | 0 | 0.1 | -25.04 |
| 2.5  | 1 | 1 | 1 | 0.032 | 1051  | -19.54 | -29.5 | 0 | 0.1 | -25.17 |
| 2.8  | 1 | 1 | 1 | 0.031 | 1444  | -18.99 | -29.5 | 0 | 0.1 | -25.28 |
| 2.5  | 1 | 1 | 1 | 0.029 | 1135  | -16.77 | -29.5 | 0 | 0.1 | -25.45 |
| 3.0  | 1 | 1 | 1 | 0.026 | 1380  | -17.49 | -29.5 | 0 | 0.1 | -25.63 |
| 2.8  | 1 | 1 | 1 | 0.024 | 825.2 | -23.71 | -29.5 | 0 | 0.1 | -25.78 |
| 2.8  | 1 | 1 | 1 | 0.024 | 1169  | -22.29 | -29.5 | 0 | 0.1 | -25.80 |
| 3.6  | 1 | 1 | 1 | 0.034 | 545.1 | -24.12 | -29.5 | 0 | 0.1 | -25.76 |
| 4.5  | 1 | 1 | 1 | 0.047 | 1029  | -22.62 | -29.5 | 0 | 0.1 | -25.72 |
| 3.5  | 1 | 1 | 1 | 0.052 | 812   | -22.57 | -29.5 | 0 | 0.1 | -25.70 |
| 3.0  | 1 | 1 | 1 | 0.065 | 990.6 | -22.58 | -29.5 | 0 | 0.1 | -25.66 |
| 4.3  | 1 | 1 | 1 | 0.078 | 1846  | -19.50 | -29.5 | 0 | 0.1 | -25.62 |
| 2.9  | 1 | 1 | 1 | 0.096 | 784.2 | -18.79 | -29.5 | 0 | 0.1 | -25.55 |
| 10.9 | 1 | 1 | 1 | 0.024 | 1121  | -20.91 | -29.5 | 0 | 0.1 | -25.14 |
| 7.7  | 1 | 1 | 1 | 0.178 | 1751  | -21.62 | -29.5 | 0 | 0.1 | -25.34 |
| 3.0  | 1 | 1 | 1 | 0.230 | 1203  | -15.59 | -29.5 | 0 | 0.1 | -23.92 |
| 1.9  | 1 | 1 | 1 | 0.180 | 1209  | -20.02 | -29.5 | 0 | 0.1 | -24.60 |
| 4.0  | 1 | 1 | 1 | 0.145 | 1019  | -16.71 | -29.5 | 0 | 0.1 | -24.60 |
| 4.3  | 1 | 1 | 1 | 0.140 | 2182  | -16.46 | -29.5 | 0 | 0.1 | -24.60 |
| 4.4  | 1 | 1 | 1 | 0.112 | 1301  | -15.69 | -29.5 | 0 | 0.1 | -24.69 |
| 2.5  | 1 | 1 | 1 | 0.092 | 1099  | -14.68 | -29.5 | 0 | 0.1 | -24.76 |
| 3.8  | 1 | 1 | 1 | 0.078 | 548.4 | -21.22 | -29.5 | 0 | 0.1 | -24.80 |
| 3.8  | 1 | 1 | 1 | 0.067 | 960.4 | -18.17 | -29.5 | 0 | 0.1 | -24.84 |
| 3.2  | 1 | 1 | 1 | 0.064 | 727   | -21.34 | -29.5 | 0 | 0.1 | -24.85 |
| 3.5  | 1 | 1 | 1 | 0.060 | 933.8 | -20.15 | -29.5 | 0 | 0.1 | -24.76 |
| 4.5  | 1 | 1 | 1 | 0.054 | 693.8 | -21.47 | -29.5 | 0 | 0.1 | -24.64 |
| 0.9  | 1 | 1 | 1 | 0.052 | 1452  | -17.50 | -29.5 | 0 | 0.1 | -24.61 |

|      |   |   |   |       |       |        |       |   |     |        |
|------|---|---|---|-------|-------|--------|-------|---|-----|--------|
| 2.0  | 1 | 1 | 1 | 0.055 | 619.8 | -23.74 | -29.5 | 0 | 0.1 | -24.65 |
| 4.0  | 1 | 1 | 1 | 0.086 | 539.6 | -18.38 | -29.5 | 0 | 0.1 | -25.03 |
| 2.0  | 1 | 1 | 1 | 0.092 | 435.7 | -24.09 | -29.5 | 0 | 0.1 | -25.12 |
| 2.0  | 1 | 1 | 1 | 0.113 | 938.4 | -22.08 | -29.5 | 0 | 0.1 | -25.37 |
| 5.1  | 1 | 1 | 1 | 0.126 | 1196  | -18.53 | -29.5 | 0 | 0.1 | -25.54 |
| 3.0  | 1 | 1 | 1 | 0.126 | 864.1 | -18.51 | -29.5 | 0 | 0.1 | -25.54 |
| 3.0  | 1 | 1 | 1 | 0.136 | 1063  | -18.50 | -29.5 | 0 | 0.1 | -25.42 |
| 6.5  | 1 | 1 | 1 | 0.145 | 1125  | -21.26 | -29.5 | 0 | 0.1 | -25.31 |
| 6.0  | 1 | 1 | 1 | 0.158 | 1686  | -16.74 | -29.5 | 0 | 0.1 | -25.16 |
| 7.0  | 1 | 1 | 1 | 0.164 | 2069  | -16.71 | -29.5 | 0 | 0.1 | -25.10 |
| 8.1  | 1 | 1 | 1 | 0.170 | 1234  | -15.15 | -29.5 | 0 | 0.1 | -25.02 |
| 8.9  | 1 | 1 | 1 | 0.183 | 1723  | -15.88 | -29.5 | 0 | 0.1 | -25.07 |
| 10.2 | 1 | 1 | 1 | 0.190 | 1901  | -16.49 | -29.5 | 0 | 0.1 | -25.09 |
| 11.3 | 1 | 1 | 1 | 0.214 | 1733  | -15.90 | -29.5 | 0 | 0.1 | -25.18 |
| 9.2  | 1 | 1 | 1 | 0.218 | 1675  | -15.01 | -29.5 | 0 | 0.1 | -25.20 |
| 10.0 | 1 | 1 | 1 | 0.207 | 1663  | -18.45 | -29.5 | 0 | 0.1 | -25.40 |
| 10.0 | 1 | 1 | 1 | 0.200 | 2329  | -15.70 | -29.5 | 0 | 0.1 | -25.51 |
| 11.2 | 1 | 1 | 1 | 0.197 | 2266  | -15.33 | -29.5 | 0 | 0.1 | -25.57 |
| 11.9 | 1 | 1 | 1 | 0.196 | 1509  | -15.16 | -29.5 | 0 | 0.1 | -25.59 |
| 12.0 | 1 | 1 | 1 | 0.161 | 1756  | -16.16 | -29.5 | 0 | 0.1 | -25.38 |
| 11.4 | 1 | 1 | 1 | 0.125 | 1572  | -15.34 | -29.5 | 0 | 0.1 | -25.16 |
| 12.2 | 1 | 1 | 1 | 0.105 | 2244  | -15.59 | -29.5 | 0 | 0.1 | -25.05 |
| 13.8 | 1 | 1 | 1 | 0.078 | 1903  | -14.56 | -29.5 | 0 | 0.1 | -24.88 |
| 13.0 | 1 | 1 | 1 | 0.054 | 1215  | -22.36 | -29.5 | 0 | 0.1 | -24.74 |
| 12.0 | 1 | 1 | 1 | 0.058 | 2962  | -17.71 | -29.5 | 0 | 0.1 | -24.76 |
| 11.5 | 1 | 1 | 1 | 0.096 | 1114  | -15.15 | -29.5 | 0 | 0.1 | -24.71 |
| 11.0 | 1 | 1 | 1 | 0.126 | 1565  | -13.46 | -29.5 | 0 | 0.1 | -24.69 |
| 9.7  | 1 | 1 | 1 | 0.168 | 887.3 | -16.56 | -29.5 | 0 | 0.1 | -24.67 |
| 11.5 | 1 | 1 | 1 | 0.222 | 2240  | -14.39 | -29.5 | 0 | 0.1 | -24.63 |
| 8.9  | 1 | 1 | 1 | 0.270 | 578.8 | -13.98 | -29.5 | 0 | 0.1 | -24.60 |
| 8.6  | 1 | 1 | 1 | 0.279 | 2753  | -15.26 | -29.5 | 0 | 0.1 | -24.60 |

|      |   |   |   |       |       |        |       |   |     |        |
|------|---|---|---|-------|-------|--------|-------|---|-----|--------|
| 5.0  | 1 | 1 | 1 | 0.321 | 1280  | -14.10 | -29.5 | 0 | 0.1 | -24.60 |
| 8.4  | 1 | 1 | 1 | 0.372 | 1071  | -14.18 | -29.5 | 0 | 0.1 | -24.61 |
| 8.0  | 1 | 1 | 1 | 0.458 | 717.4 | -16.87 | -29.5 | 0 | 0.1 | -24.61 |
| 8.0  | 1 | 1 | 1 | 0.466 | 805.6 | -21.74 | -29.5 | 0 | 0.1 | -24.61 |
| 6.4  | 1 | 1 | 1 | 0.500 | 2192  | -20.31 | -29.5 | 0 | 0.1 | -24.61 |
| 8.0  | 1 | 1 | 1 | 0.390 | 1389  | -14.07 | -29.5 | 0 | 0.1 | -25.03 |
| 6.5  | 1 | 1 | 1 | 0.290 | 1138  | -25.16 | -29.5 | 0 | 0.1 | -25.41 |
| 6.0  | 1 | 1 | 1 | 0.240 | 483.3 | -23.93 | -29.5 | 0 | 0.1 | -25.60 |
| 5.0  | 1 | 1 | 1 | 0.170 | 883.3 | -22.31 | -29.5 | 0 | 0.1 | -25.86 |
| 2.8  | 1 | 1 | 1 | 0.150 | 1231  | -19.40 | -29.5 | 0 | 0.1 | -25.94 |
| 5.0  | 1 | 1 | 1 | 0.143 | 704   | -22.80 | -29.5 | 0 | 0.1 | -25.56 |
| 5.6  | 1 | 1 | 1 | 0.134 | 1006  | -19.71 | -29.5 | 0 | 0.1 | -25.04 |
| 5.8  | 1 | 1 | 1 | 0.123 | 1060  | -18.81 | -29.5 | 0 | 0.1 | -24.43 |
| 4.0  | 1 | 1 | 1 | 0.120 | 1144  | -18.42 | -29.5 | 0 | 0.1 | -24.28 |
| 5.2  | 1 | 1 | 1 | 0.126 | 803.7 | -19.14 | -29.5 | 0 | 0.1 | -24.31 |
| 5.1  | 1 | 1 | 1 | 0.136 | 1126  | -17.78 | -29.5 | 0 | 0.1 | -24.34 |
| 3.3  | 1 | 1 | 1 | 0.139 | 1072  | -17.64 | -29.5 | 0 | 0.1 | -24.36 |
| 2.0  | 1 | 1 | 1 | 0.149 | 1175  | -16.46 | -29.5 | 0 | 0.1 | -24.39 |
| 3.0  | 1 | 1 | 1 | 0.156 | 645.3 | -10.05 | -29.5 | 0 | 0.1 | -24.42 |
| 0.8  | 1 | 1 | 1 | 0.166 | 1136  | -16.26 | -29.5 | 0 | 0.1 | -24.46 |
| -0.1 | 1 | 1 | 1 | 0.170 | 1031  | -16.71 | -29.5 | 0 | 0.1 | -24.48 |
| 1.8  | 1 | 1 | 1 | 0.145 | 628   | -23.06 | -29.5 | 0 | 0.1 | -24.55 |
| 2.5  | 1 | 1 | 1 | 0.110 | 556.7 | -23.03 | -29.5 | 0 | 0.1 | -24.66 |
| 3.0  | 1 | 1 | 1 | 0.076 | 733.4 | -21.32 | -29.5 | 0 | 0.1 | -24.77 |
| 2.5  | 1 | 1 | 1 | 0.041 | 1173  | -22.21 | -29.5 | 0 | 0.1 | -24.87 |
| 1.2  | 1 | 1 | 1 | 0.036 | 858.5 | -18.62 | -29.5 | 0 | 0.1 | -24.89 |
| 2.0  | 1 | 1 | 1 | 0.034 | 484.2 | -24.14 | -29.5 | 0 | 0.1 | -25.04 |
| 2.5  | 1 | 1 | 1 | 0.032 | 686.3 | -19.54 | -29.5 | 0 | 0.1 | -25.17 |
| 2.8  | 1 | 1 | 1 | 0.031 | 942.7 | -18.99 | -29.5 | 0 | 0.1 | -25.28 |
| 2.5  | 1 | 1 | 1 | 0.029 | 741.1 | -16.77 | -29.5 | 0 | 0.1 | -25.45 |
| 3.0  | 1 | 1 | 1 | 0.026 | 901.1 | -17.49 | -29.5 | 0 | 0.1 | -25.63 |

|     |   |   |   |       |       |        |       |   |     |        |
|-----|---|---|---|-------|-------|--------|-------|---|-----|--------|
| 2.8 | 1 | 1 | 1 | 0.024 | 538.8 | -23.71 | -29.5 | 0 | 0.1 | -25.78 |
| 2.8 | 1 | 1 | 1 | 0.024 | 763.1 | -22.29 | -29.5 | 0 | 0.1 | -25.80 |
| 3.6 | 1 | 1 | 1 | 0.034 | 355.9 | -24.12 | -29.5 | 0 | 0.1 | -25.76 |
| 4.5 | 1 | 1 | 1 | 0.047 | 671.7 | -22.62 | -29.5 | 0 | 0.1 | -25.72 |
| 3.5 | 1 | 1 | 1 | 0.052 | 530.1 | -22.57 | -29.5 | 0 | 0.1 | -25.70 |
| 3.0 | 1 | 1 | 1 | 0.065 | 646.7 | -22.58 | -29.5 | 0 | 0.1 | -25.66 |
| 4.3 | 1 | 1 | 1 | 0.078 | 1205  | -19.50 | -29.5 | 0 | 0.1 | -25.62 |
| 2.9 | 1 | 1 | 1 | 0.096 | 512   | -18.79 | -29.5 | 0 | 0.1 | -25.55 |

\* Groundwater input as mean DST, HST, and P84 including fractionation (O'Leary 1984) for modified modelling.

**Table S5:** Modelled pCO<sub>2</sub>init. versus modelled CO<sub>2</sub> loss (per catchment area) for results computed with R = 10 and 19 % and with groundwater contribution.

| date<br>dd-mmm-yyyy | pCO <sub>2</sub> init.* | CO <sub>2</sub> loss*                        | pCO <sub>2</sub> init.* | CO <sub>2</sub> loss*                        | pCO <sub>2</sub> init.# | CO <sub>2</sub> loss#                                |
|---------------------|-------------------------|----------------------------------------------|-------------------------|----------------------------------------------|-------------------------|------------------------------------------------------|
|                     | 10%<br>/ppmV            | 10%<br>/mg C m <sup>-2</sup> d <sup>-1</sup> | 19%<br>/ppmV            | 19%<br>/mg C m <sup>-2</sup> d <sup>-1</sup> | Groundwater<br>/ppmV    | Groundwater<br>/mg C m <sup>-2</sup> d <sup>-1</sup> |
| 24-Sep-2014         | 4248                    | 4.36                                         | 4884                    | 5.34                                         | 2799                    | 2.13                                                 |
| 29-Oct-2014         | 5376                    | 2.30                                         | 5900                    | 2.68                                         | 4049                    | 1.33                                                 |
| 12-Dec-2014         | 15389                   | 15.07                                        | 18581                   | 18.53                                        | 6270                    | 5.16                                                 |
| 20-Jan-2015         | 3713                    | 2.34                                         | 3985                    | 2.64                                         | 2651                    | 1.20                                                 |
| 16-Feb-2015         | 5992                    | 3.18                                         | 6674                    | 3.65                                         | 3747                    | 1.66                                                 |
| 18-Feb-2015         | (5563) <sup>†</sup>     | (2.73)                                       | (6189)                  | (3.13)                                       | (6141)                  | (3.00)                                               |
| 28-Feb-2015         | (3416)                  | (1.40)                                       | (3764)                  | (1.60)                                       | 18109                   | 9.39                                                 |
| 7-Mar-2015          | (1914)                  | (0.68)                                       | (2066)                  | (0.78)                                       | 26439                   | 16.48                                                |
| 12-Mar-2015         | 840                     | 0.23                                         | 853                     | 0.25                                         | 783                     | 0.14                                                 |
| 16-Mar-2015         | 4202                    | 4.23                                         | 4657                    | 4.88                                         | 2833                    | 2.29                                                 |
| 17-Mar-2015         | 1295                    | 1.89                                         | 1335                    | 2.08                                         | 1137                    | 1.09                                                 |
| 22-Mar-2015         | 2454                    | 1.73                                         | 2611                    | 1.94                                         | 1879                    | 0.95                                                 |
| 29-Mar-2015         | 1198                    | 1.30                                         | 1231                    | 1.44                                         | 1049                    | 0.70                                                 |
| 31-Mar-2015         | (991)                   | (0.95)                                       | (1012)                  | (1.07)                                       | (892)                   | (0.41)                                               |
| 1-Apr-2015          | 887                     | 0.47                                         | 902                     | 0.54                                         | 813                     | 0.13                                                 |
| 10-Apr-2015         | 955                     | 1.18                                         | 973                     | 1.26                                         | 884                     | 0.87                                                 |
| 12-Apr-2015         | 574                     | 0.13                                         | 578                     | 0.15                                         | 560                     | 0.05                                                 |
| 18-Apr-2015         | 1757                    | 1.13                                         | 1828                    | 1.28                                         | 1547                    | 0.72                                                 |
| 22-Apr-2015         | 5743                    | 4.67                                         | 6400                    | 5.39                                         | 4346                    | 3.12                                                 |
| 22-Apr-2015         | 2465                    | 1.64                                         | 2602                    | 1.80                                         | 2121                    | 1.23                                                 |
| 30-Apr-2015         | 4066                    | 4.41                                         | 4412                    | 4.97                                         | 3204                    | 3.01                                                 |
| 7-May-2015          | 2637                    | 1.48                                         | 2790                    | 1.67                                         | 2195                    | 0.94                                                 |
| 17-May-2015         | (24822)                 | (12.91)                                      | (46164)                 | (24.71)                                      | 25322                   | 13.81                                                |
| 21-May-2015         | (33696)                 | (17.39)                                      | (63514)                 | (33.5)                                       | (20178)                 | (10.43)                                              |
| 26-May-2015         | 44788                   | 21.66                                        | 85201                   | 41.91                                        | 13748                   | 6.11                                                 |



|             |         |         |         |         |         |         |
|-------------|---------|---------|---------|---------|---------|---------|
| 1-Jun-2015  | (39624) | (17.37) | (73729) | (33.01) | 50967   | 21.78   |
| 4-Jun-2015  | (37042) | (14.76) | (67993) | (27.74) | 44357   | 16.38   |
| 15-Jun-2015 | (27575) | (10.22) | (46961) | (18.02) | 40046   | 13.71   |
| 17-Jun-2015 | (25854) | (9.42)  | (43137) | (16.31) | 131046  | 49.74   |
| 1-Jul-2015  | 13805   | 4.51    | 16370   | 5.50    | 8818    | 2.59    |
| 9-Jul-2015  | (11996) | (3.74)  | (14174) | (4.56)  | (47478) | (16.09) |
| 13-Jul-2015 | (11092) | (3.62)  | (13076) | (4.41)  | (66808) | (24.22) |
| 14-Jul-2015 | (10866) | (3.61)  | (12802) | (4.40)  | 71641   | 26.60   |
| 23-Jul-2015 | (8831)  | (2.28)  | (10332) | (2.77)  | 113082  | 34.13   |
| 1-Aug-2015  | (6796)  | (1.54)  | (7861)  | (1.87)  | (76069) | (21.48) |
| 6-Aug-2015  | (5666)  | (1.17)  | (6489)  | (1.41)  | (55506) | (15.08) |
| 13-Aug-2015 | (4084)  | (0.69)  | (4568)  | (0.82)  | (26718) | (6.78)  |
| 19-Aug-2015 | 2727    | 1.58    | 2921    | 1.84    | 2043    | 0.67    |
| 18-Aug-2015 | (2953)  | (1.29)  | (3195)  | (1.52)  | (6155)  | (4.28)  |
| 26-Aug-2015 | (3221)  | (0.54)  | (3465)  | (0.61)  | 12464   | 3.19    |
| 31-Aug-2015 | (3573)  | (0.64)  | (3853)  | (0.72)  | (8468)  | (1.94)  |
| 7-Sep-2015  | 4067    | 2.63    | 4397    | 2.93    | 2873    | 1.57    |
| 16-Sep-2015 | (2844)  | (0.60)  | (3037)  | (0.66)  | (2119)  | (0.38)  |
| 24-Sep-2015 | 1757    | 0.36    | 1828    | 0.39    | 1449    | 0.25    |
| 25-Sep-2015 | (10988) | (3.64)  | (17265) | (5.93)  | (3934)  | (1.08)  |
| 30-Sep-2015 | 57145   | 18.66   | 94454   | 31.20   | 16358   | 4.95    |
| 6-Oct-2015  | 19080   | 5.27    | 22455   | 6.28    | 9692    | 2.48    |
| 16-Oct-2015 | 2101    | 1.11    | 2205    | 1.21    | 1669    | 0.71    |
| 17-Oct-2015 | 1439    | 0.52    | 1487    | 0.57    | 1230    | 0.26    |
| 21-Oct-2015 | 11317   | 11.27   | 12661   | 13.05   | 6653    | 5.12    |
| 1-Nov-2015  | 106773  | 34.19   | (6924)  | (1.67)  | 28514   | 8.71    |
| 11-Nov-2015 | 1648    | 0.22    | 1709    | 0.29    | 1471    | 0.03    |
| 16-Nov-2015 | 648     | 0.68    | 653     | 0.78    | 633     | 0.39    |
| 23-Nov-2015 | 1554    | 0.42    | 1608    | 0.47    | 1447    | 0.31    |
| 25-Nov-2015 | 4584    | 2.16    | 5001    | 2.46    | 3912    | 1.68    |
| 30-Nov-2015 | 1086    | 0.85    | 1110    | 0.96    | 1021    | 0.57    |

|             |       |       |       |       |      |      |
|-------------|-------|-------|-------|-------|------|------|
| 7-Dec-2015  | 2786  | 1.48  | 2960  | 1.65  | 2220 | 0.93 |
| 15-Dec-2015 | 3831  | 2.12  | 4143  | 2.38  | 2609 | 1.08 |
| 17-Dec-2015 | 5297  | 4.16  | 5878  | 4.79  | 3185 | 1.88 |
| 21-Dec-2015 | 1914  | 1.02  | 1998  | 1.12  | 1515 | 0.57 |
| 28-Dec-2015 | 5949  | 4.41  | 6631  | 5.08  | 3537 | 2.06 |
| 30-Dec-2015 | 5269  | 3.66  | 5819  | 4.17  | 3262 | 1.78 |
| 6-Jan-2016  | 12031 | 7.41  | 14649 | 9.25  | 5520 | 2.83 |
| 11-Jan-2016 | 11725 | 10.56 | 14126 | 12.88 | 5568 | 4.60 |
| 18-Jan-2016 | 10398 | 6.52  | 12276 | 7.88  | 5255 | 2.78 |
| 21-Jan-2016 | 5836  | 3.25  | 6469  | 3.70  | 3625 | 1.66 |
| 26-Jan-2016 | 920   | 0.91  | 936   | 1.03  | 842  | 0.34 |
| 2-Feb-2016  | 792   | 0.70  | 803   | 0.79  | 741  | 0.29 |
| 9-Feb-2016  | 1305  | 1.16  | 1344  | 1.28  | 1140 | 0.66 |
| 16-Feb-2016 | 2857  | 1.75  | 3100  | 2.05  | 2084 | 0.76 |
| 17-Feb-2016 | 3447  | 2.80  | 3829  | 3.25  | 2347 | 1.50 |
| 24-Feb-2016 | 651   | 0.11  | 658   | 0.13  | 626  | 0.04 |
| 1-Mar-2016  | 1518  | 0.86  | 1581  | 0.95  | 1309 | 0.59 |
| 6-Mar-2016  | 4766  | 4.44  | 5571  | 5.44  | 3109 | 2.38 |
| 14-Mar-2016 | 4185  | 3.04  | 4807  | 3.62  | 2952 | 1.89 |
| 22-Mar-2016 | 19446 | 19.83 | 53831 | 57.07 | 6995 | 6.34 |
| 29-Mar-2016 | 755   | 0.40  | 766   | 0.46  | 730  | 0.26 |
| 30-Mar-2016 | 1369  | 1.41  | 1421  | 1.59  | 1259 | 1.03 |
| 3-Apr-2016  | 458   | 0.03  | 459   | 0.03  | 455  | 0.02 |
| 8-Apr-2016  | 1053  | 0.57  | 1078  | 0.64  | 996  | 0.41 |
| 10-Apr-2016 | 763   | 0.51  | 773   | 0.57  | 738  | 0.37 |
| 15-Apr-2016 | 994   | 0.51  | 1015  | 0.57  | 942  | 0.36 |
| 20-Apr-2016 | 5247  | 4.49  | 5921  | 5.30  | 3958 | 2.93 |
| 27-Apr-2016 | 844   | 0.28  | 857   | 0.30  | 809  | 0.23 |

\*Calculation with annual mean d13C-POC.

#Calculation with mean groundwater d13C-DIC as d13C-CO2init +1‰ fractionation (O'Oleary, 1984).

†(*italic*): Convergence criteria not fulfilled / interpolated data

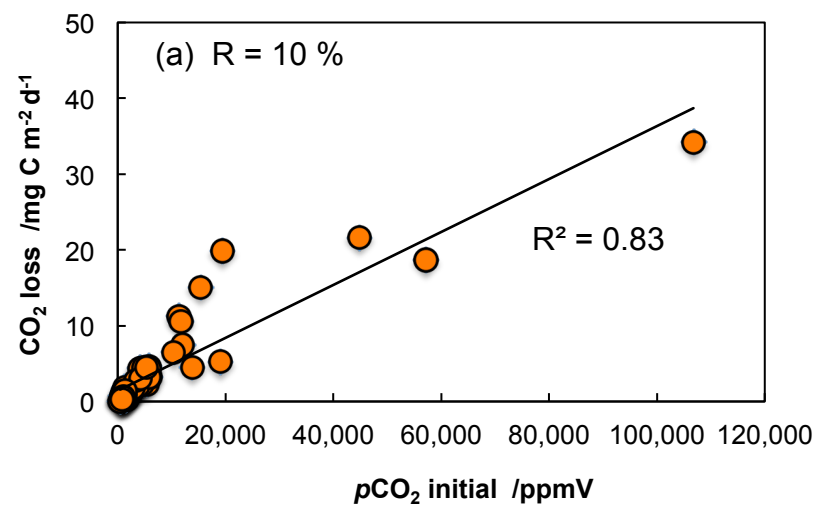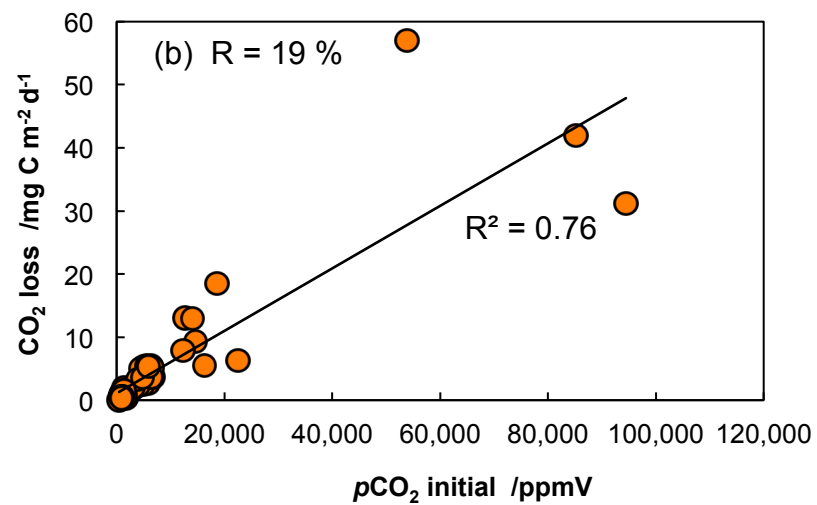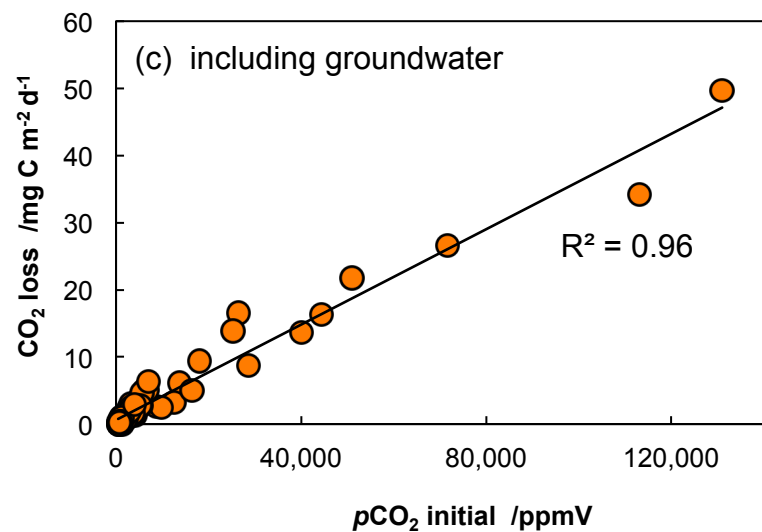

**Figure S1**  
 Modelled CO<sub>2</sub> loss per catchment area over modelled pCO<sub>2</sub> initial for results computed with (a) R = 10 %, (b) R = 19 %, and (c) including groundwater.
